# Supplementary material
Source: PubMed Central journal article supplement (PMC6224384)

**A**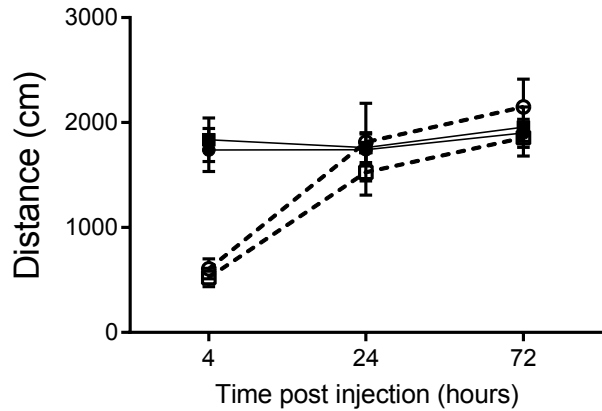**B**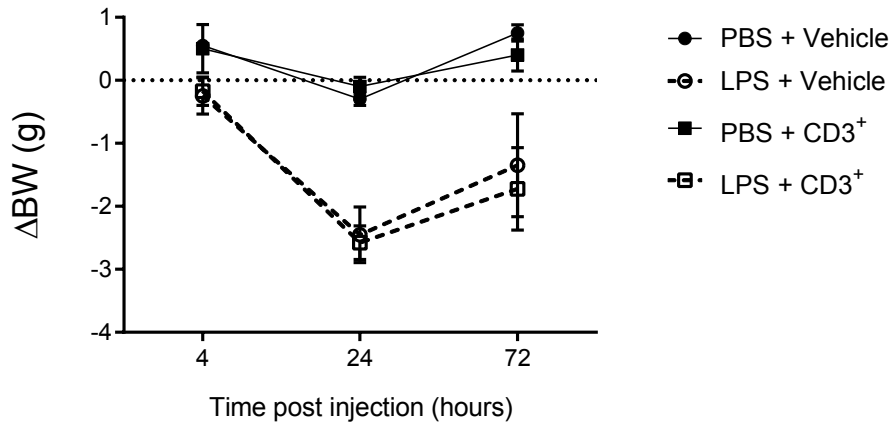

Figure S1

Supplement: 41386_2018_154_MOESM2_ESM.pdf [file 41386_2018_154_MOESM2_ESM.pdf]

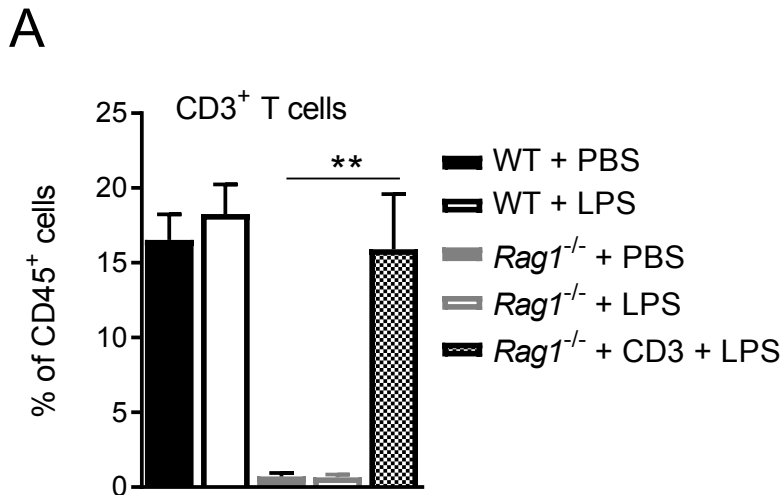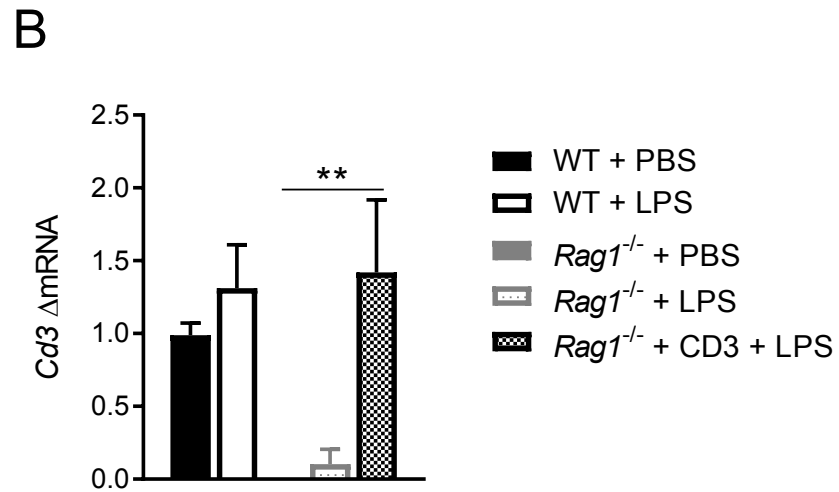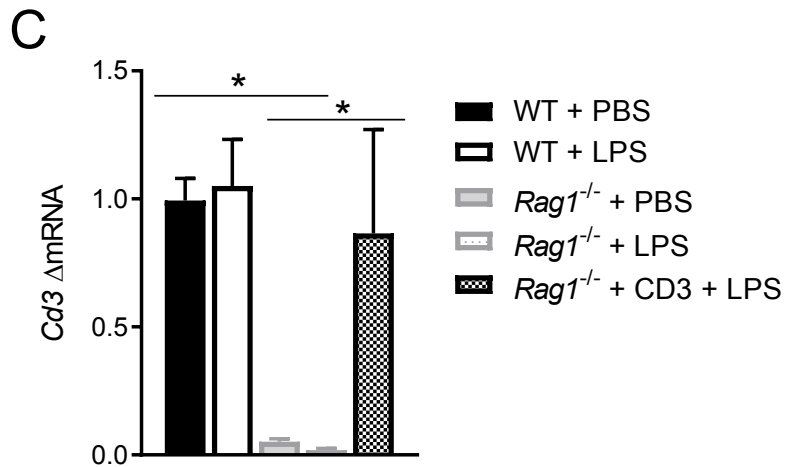

Fig. S2

Supplement: 41386_2018_154_MOESM3_ESM.pdf [file 41386_2018_154_MOESM3_ESM.pdf]

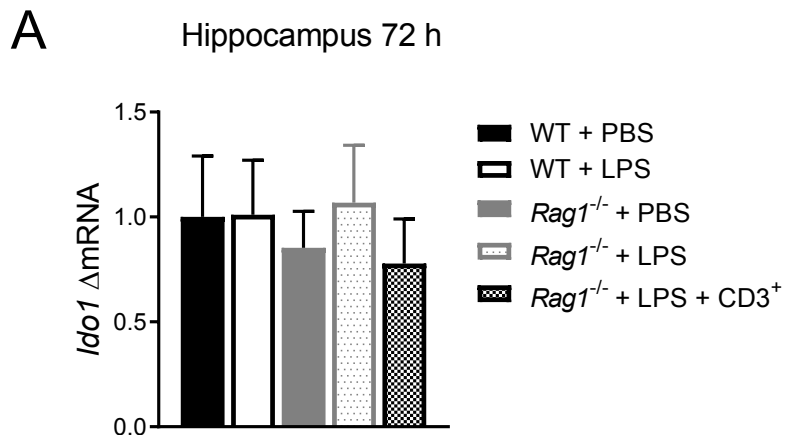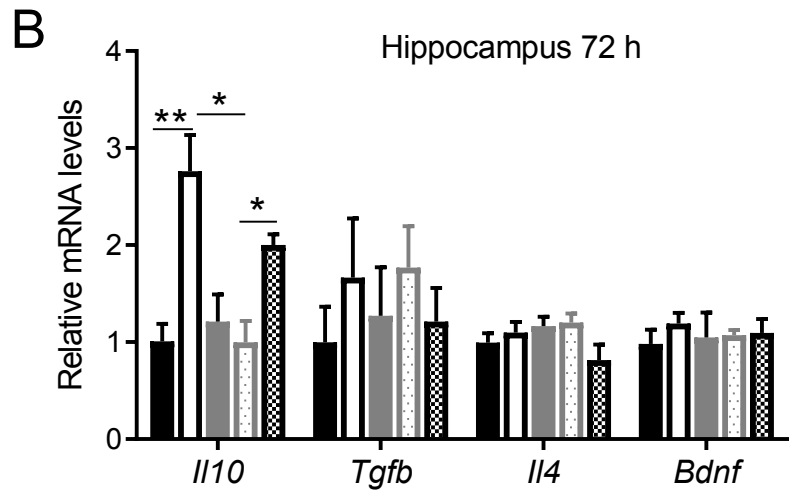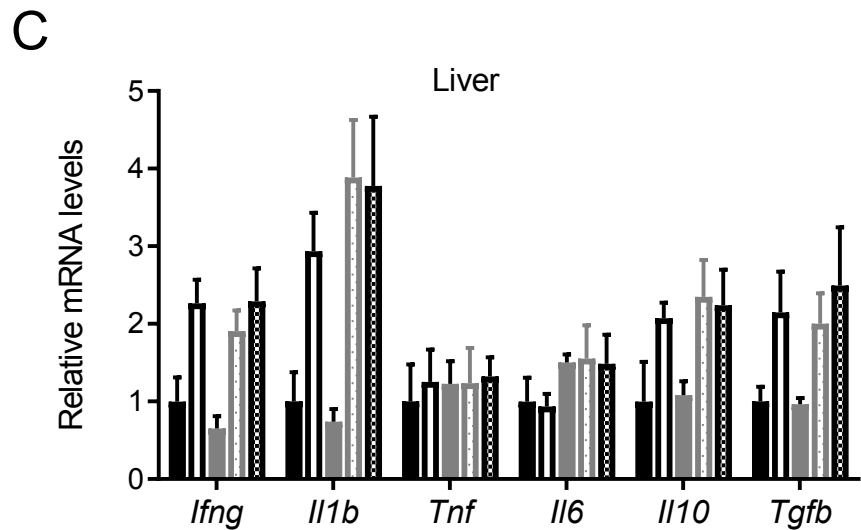

Figure S3

Supplement: 41386_2018_154_MOESM4_ESM.pdf [file 41386_2018_154_MOESM4_ESM.pdf]

**A**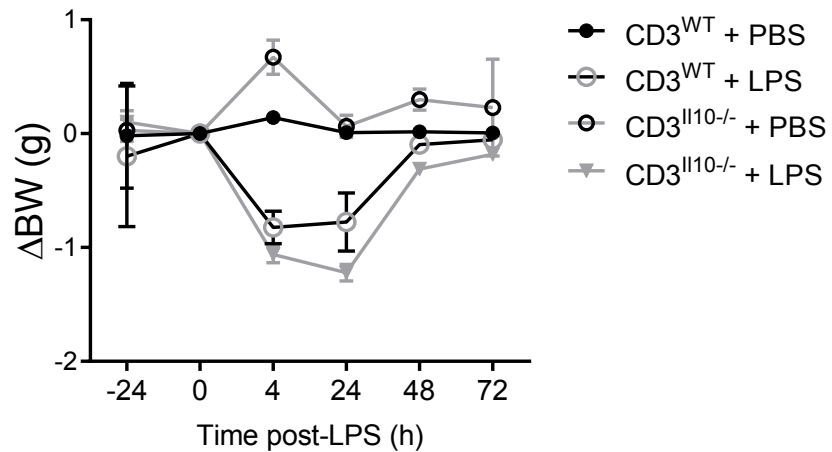**B**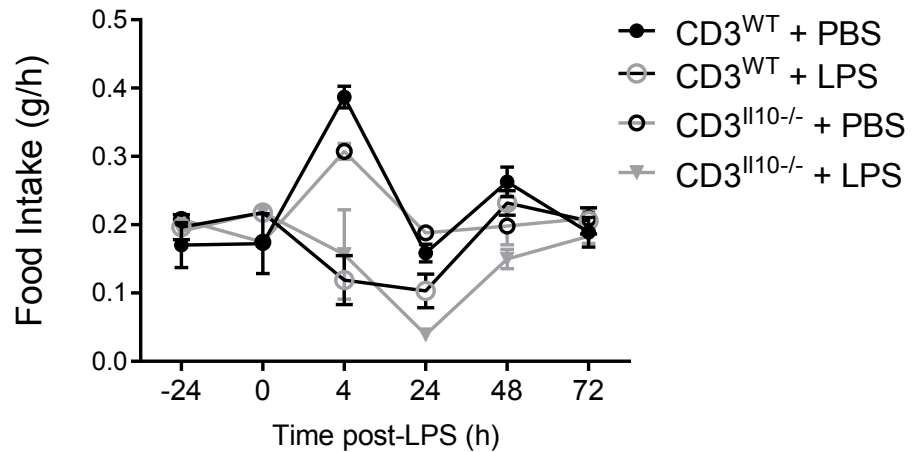**C**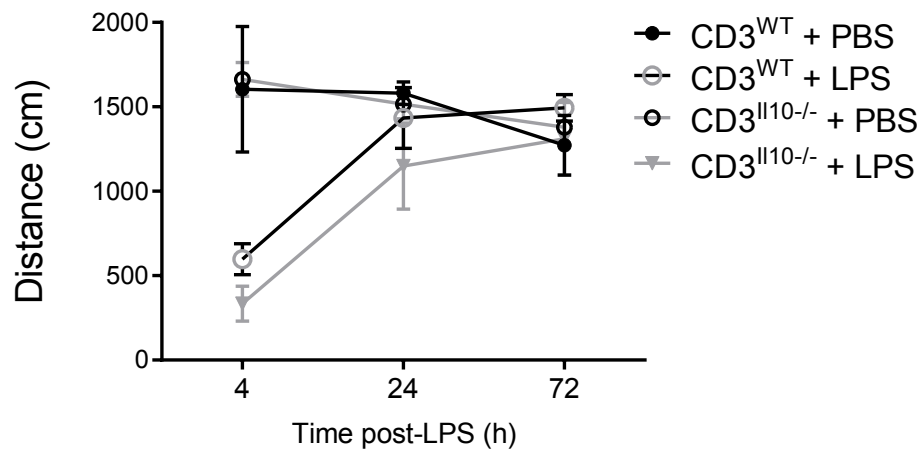

Fig. S4

Supplement: 41386_2018_154_MOESM5_ESM.pdf [file 41386_2018_154_MOESM5_ESM.pdf]

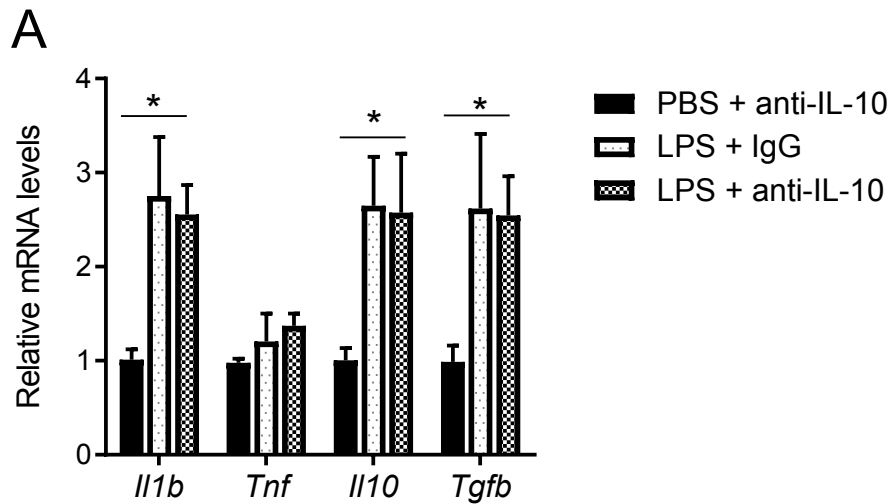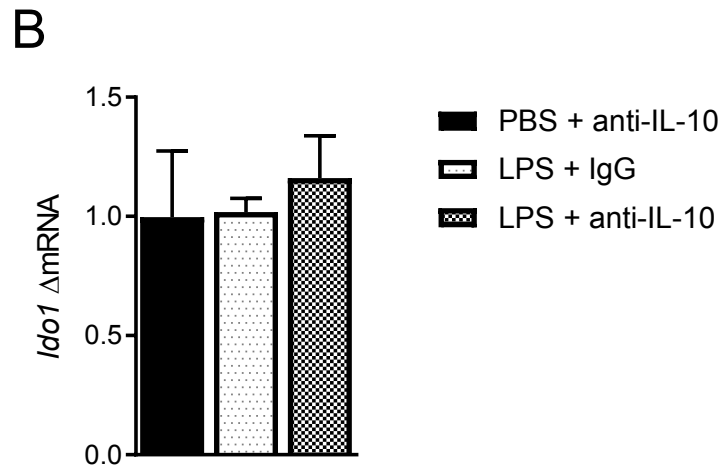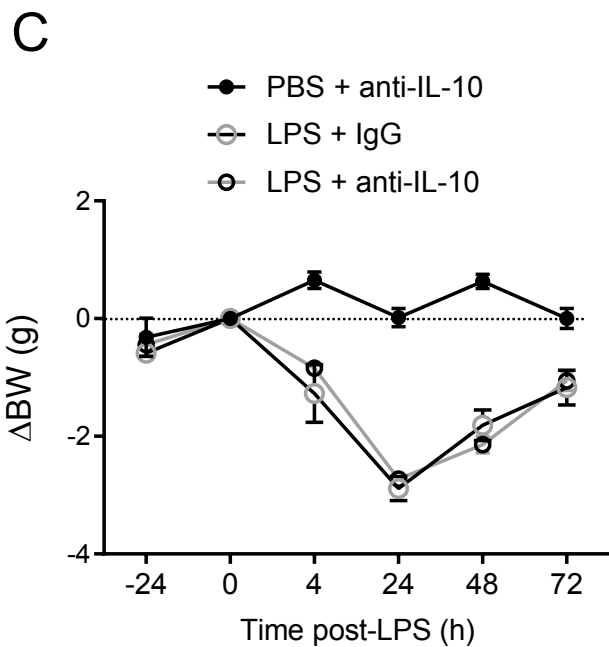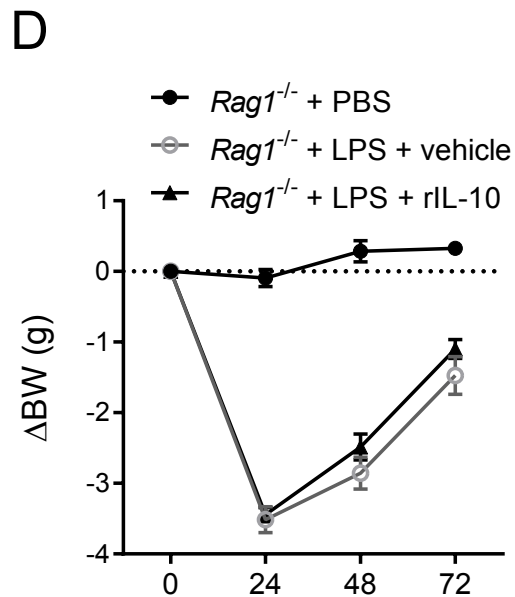

Fig. S5

Supplement: 41386_2018_154_MOESM6_ESM.pdf [file 41386_2018_154_MOESM6_ESM.pdf]
